# Supplementary material
Source: PubMed Central journal article supplement (PMC2711431)
Supplement: mmc1.pdf [file mmc1.pdf]

Biophysical Journal, Volume 96

**Supporting Material**

**Hidden Markov Analysis of Nucleosome Unwrapping Under Force**

M. Kruithof and J. van Noort

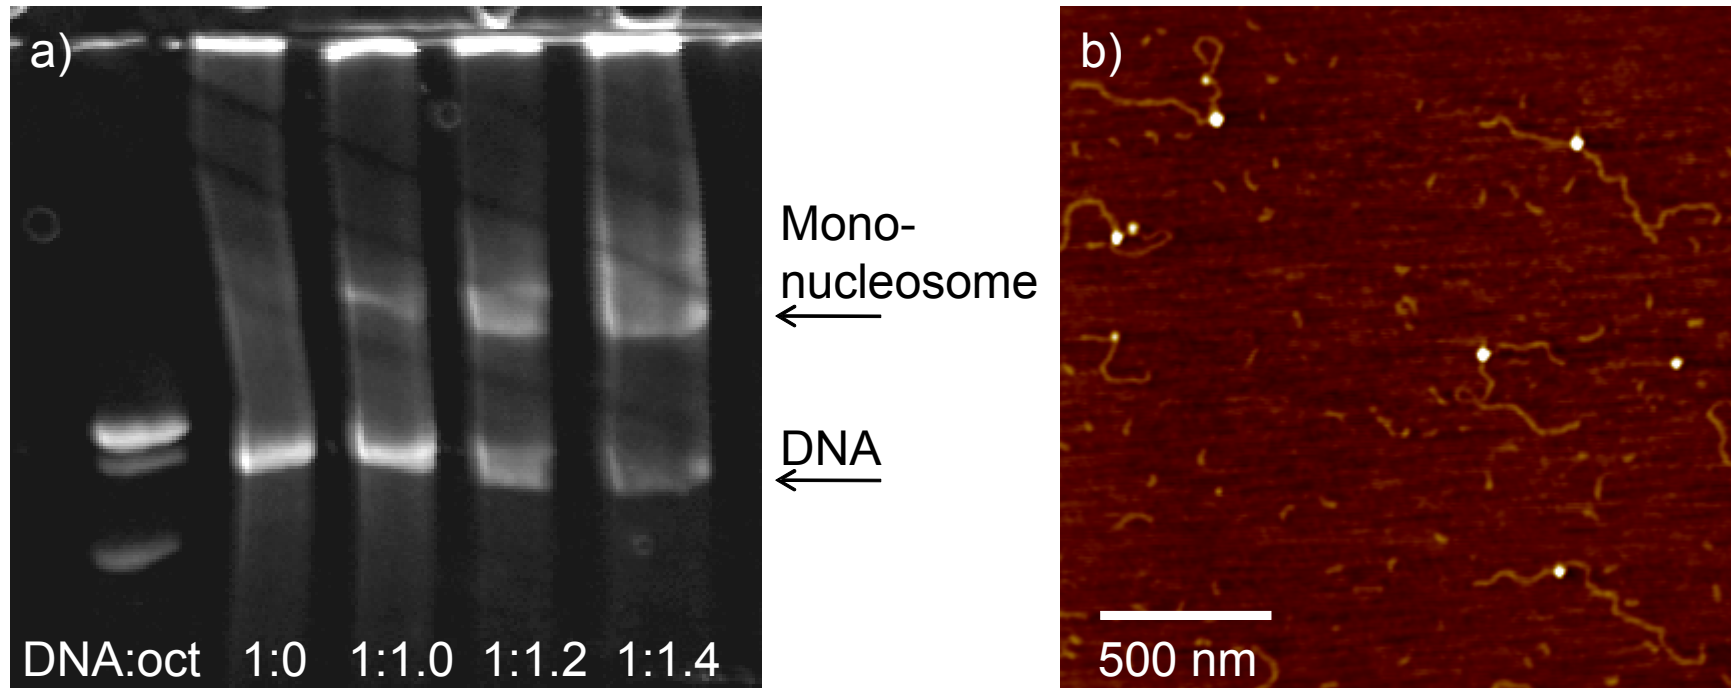

Supplementary figure 1. a) Nucleosome reconstitution was analyzed by native polyacrylamide gelelectrophoresis. b) Tapping mode Atomic Force Microscopy of reconstituted mono-nucleosomes fixed in 2% glutaraldehyde in 5 mM  $\text{MgCl}_2$ , 10 mM Hepes and deposited on freshly cleaved mica.
